# Supplementary material for: Enhanced Detection of Estrogen-like Compounds by Genetically Engineered Yeast Sensor Strains
Source: MDPI journal article supplement (doi:10.3390/bios14040193), 2024-04-15
Supplement: s1 [file s1]

**Table S1. Oligonucleotide primer sequences used in this study.**

|    | Primer name         | Primer sequence 5' to 3'                                                               | Notes                 |
|----|---------------------|----------------------------------------------------------------------------------------|-----------------------|
| 1  | PDR5_ kan_FOR       | TTTCGTATCCGCTCGTTCGAAAGACTTTAGACAAAACagctgaagcttcgtacgtgca                             | PDR5<br>knockout      |
| 2  | PDR5_ kan_REV       | AtgcggccgcggatctgccgtctcTAGAATTTTGAATTTGGTTAAGAAAAGAACTTACCAAGATGGAC                   | PDR5<br>knockout      |
| 3  | SNQ2_ kan_FOR       | ATAGAATAACACAGCTACCAAAATACGTAAAGAGAATTCaagctgaagcttcgtacgtgcagg                        | SNQ2<br>knockout      |
| 4  | SNQ2_ kan_REV       | AAAGGCAGATGAATGCACAAAATGTTAAGTTATCTGAAGCCCACAccgcggccgcataggccact                      | SNQ2<br>knockout      |
| 5  | Yor1_ kan_FOR       | TTTATATTCAAAAAGAGTAAAGCCGTTGCTATATACGAATagctgaagcttcgtacgtgcagg                        | Yor1<br>knockout      |
| 6  | Yor1_ kan_REV       | TTTATATTATTTGTTGCATGATTTTCTCTTTTATTTccgcggccgcataggccact                               | Yor1<br>knockout      |
| 11 | ADH1_ SpeI_EGFP_FOR | ACTCCCCGGGACTAGTTTAATTAACATGTCAAAA                                                     | SpeI                  |
| 12 | ADH1_ KpnI_EGFP_REV | GCTCGGTACCAATCTAGGCGCGCCTTACTTGTATAATTCA                                               | KpnI                  |
| 13 | GPD_ SalI_EGFP_FOR  | TTTTTTGTCGACCCCTAGTTACTTGTATAATTCATCCA                                                 | SalI                  |
| 14 | GPD_ NotI_EGFP_REV  | TTTTTGCGGCCGCGGACTCTCTATGTCAAAAGGCGAGGAACT                                             | NotI                  |
| 19 | CYC1_EGFP_2_rev     | TGTTAATTAAttctttACTAGTCCCGGGtattaatttagtgtgtatttgtgtttgcgtgtctataga                    | NEBuilder<br>assembly |
| 20 | CYC1_EGFP_2ERES_FOR | CTTGCATGCCTGCAGGTCGACCAGGTCACTGTGACCTCTCGAGGTCAGTGTGACCTG<br>CCGGCtcgagcagatccgccaggcg | NEBuilder<br>assembly |
